# Supplementary material for: Reanalyzing the genetic history of Kra-Dai speakers from Thailand and new insights into their genetic interactions beyond Mainland Southeast Asia
Source: PubMed Central journal article supplement (PMC10209056; doi:10.1038/s41598-023-35507-8), 2023-05-24
Supplement: 41598_2023_35507_MOESM2_ESM.pdf [file 41598_2023_35507_MOESM2_ESM.pdf]

$f_4(\text{Lao, Mbuti; a Kra-Dai-speaking group from China, an Austroasiatic-speaking group})$

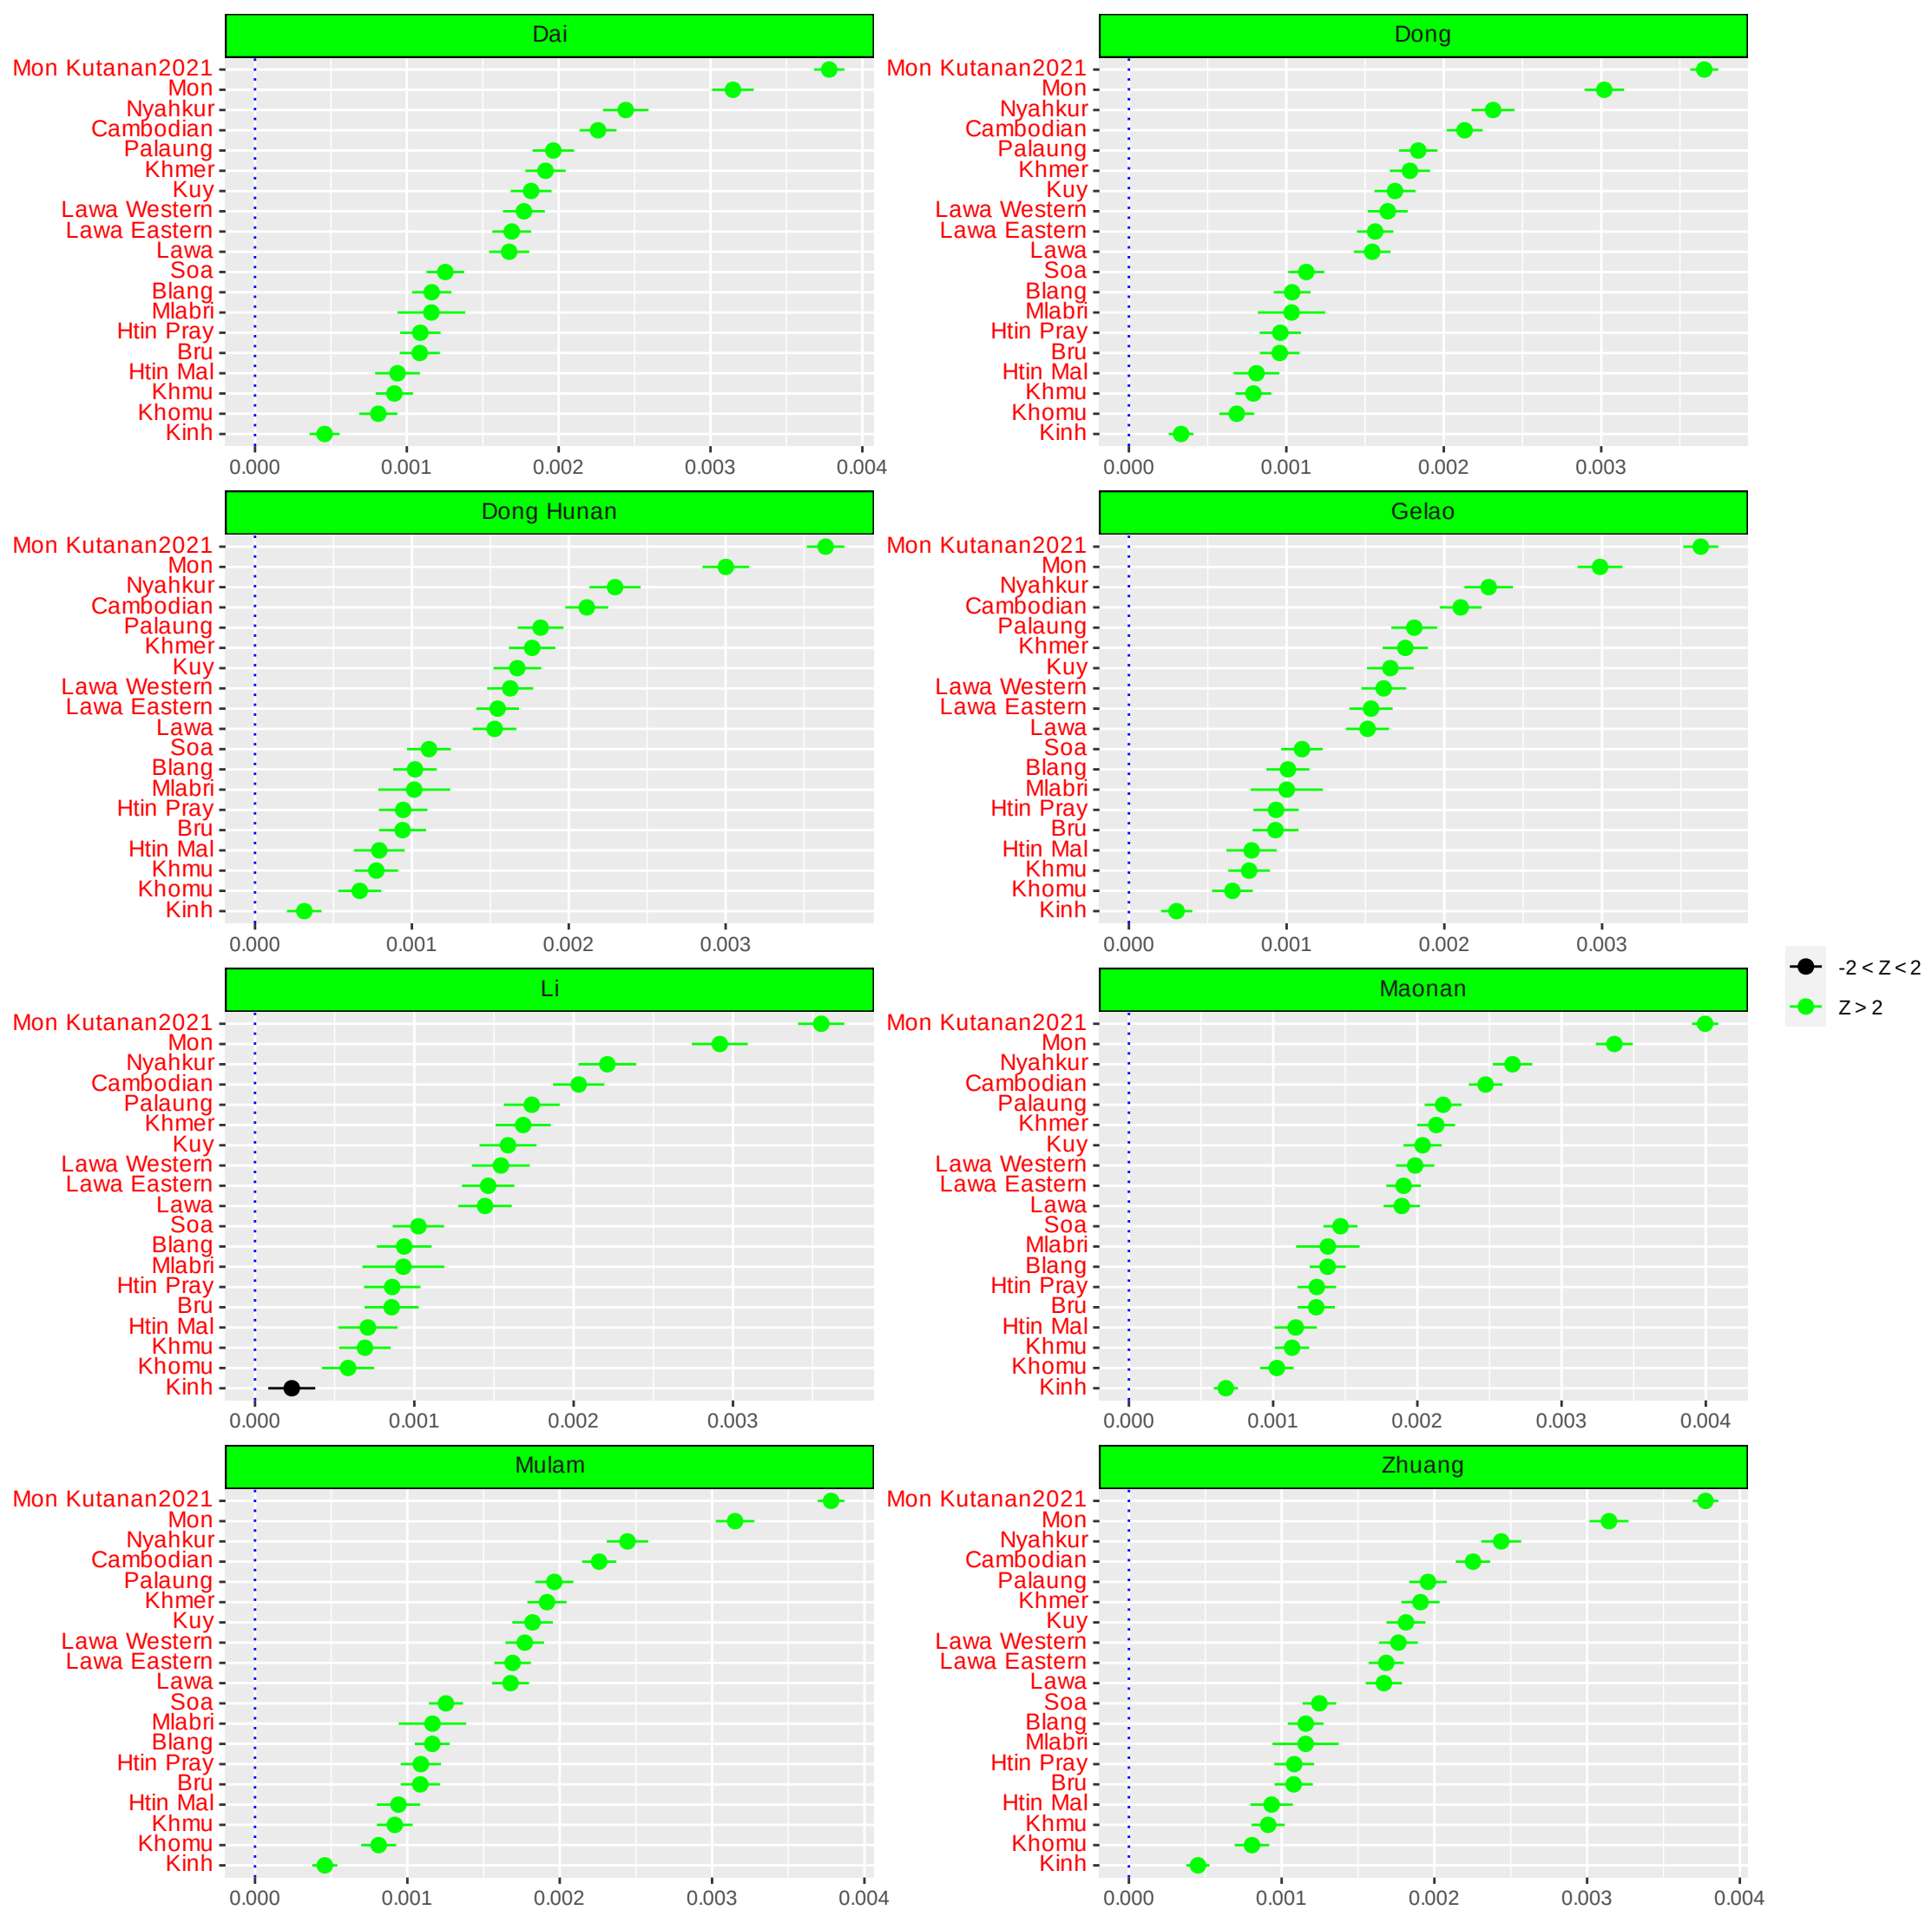

**Suppl. Fig. 2.**  $f_4$ -statistics of the form of  $f_4(\text{Lao, Mbuti; a Kra-Dai-speaking group from China, an Austroasiatic-speaking group})$ . A Lao group from Kutan2021 et al. (2021)<sup>5</sup> was used in this analysis. Kra-Dai-speaking groups are labeled above the plots on green background, while Austroasiatic-speaking groups are labeled in red.  $f_4$ -statistics with Z-scores  $> 2$  are shown in green, and those with absolute Z-scores  $< 2$  are shown in black.
