# Supplementary material for: Reanalyzing the genetic history of Kra-Dai speakers from Thailand and new insights into their genetic interactions beyond Mainland Southeast Asia
Source: PubMed Central journal article supplement (PMC10209056; doi:10.1038/s41598-023-35507-8), 2023-05-24
Supplement: 41598_2023_35507_MOESM4_ESM.pdf [file 41598_2023_35507_MOESM4_ESM.pdf]

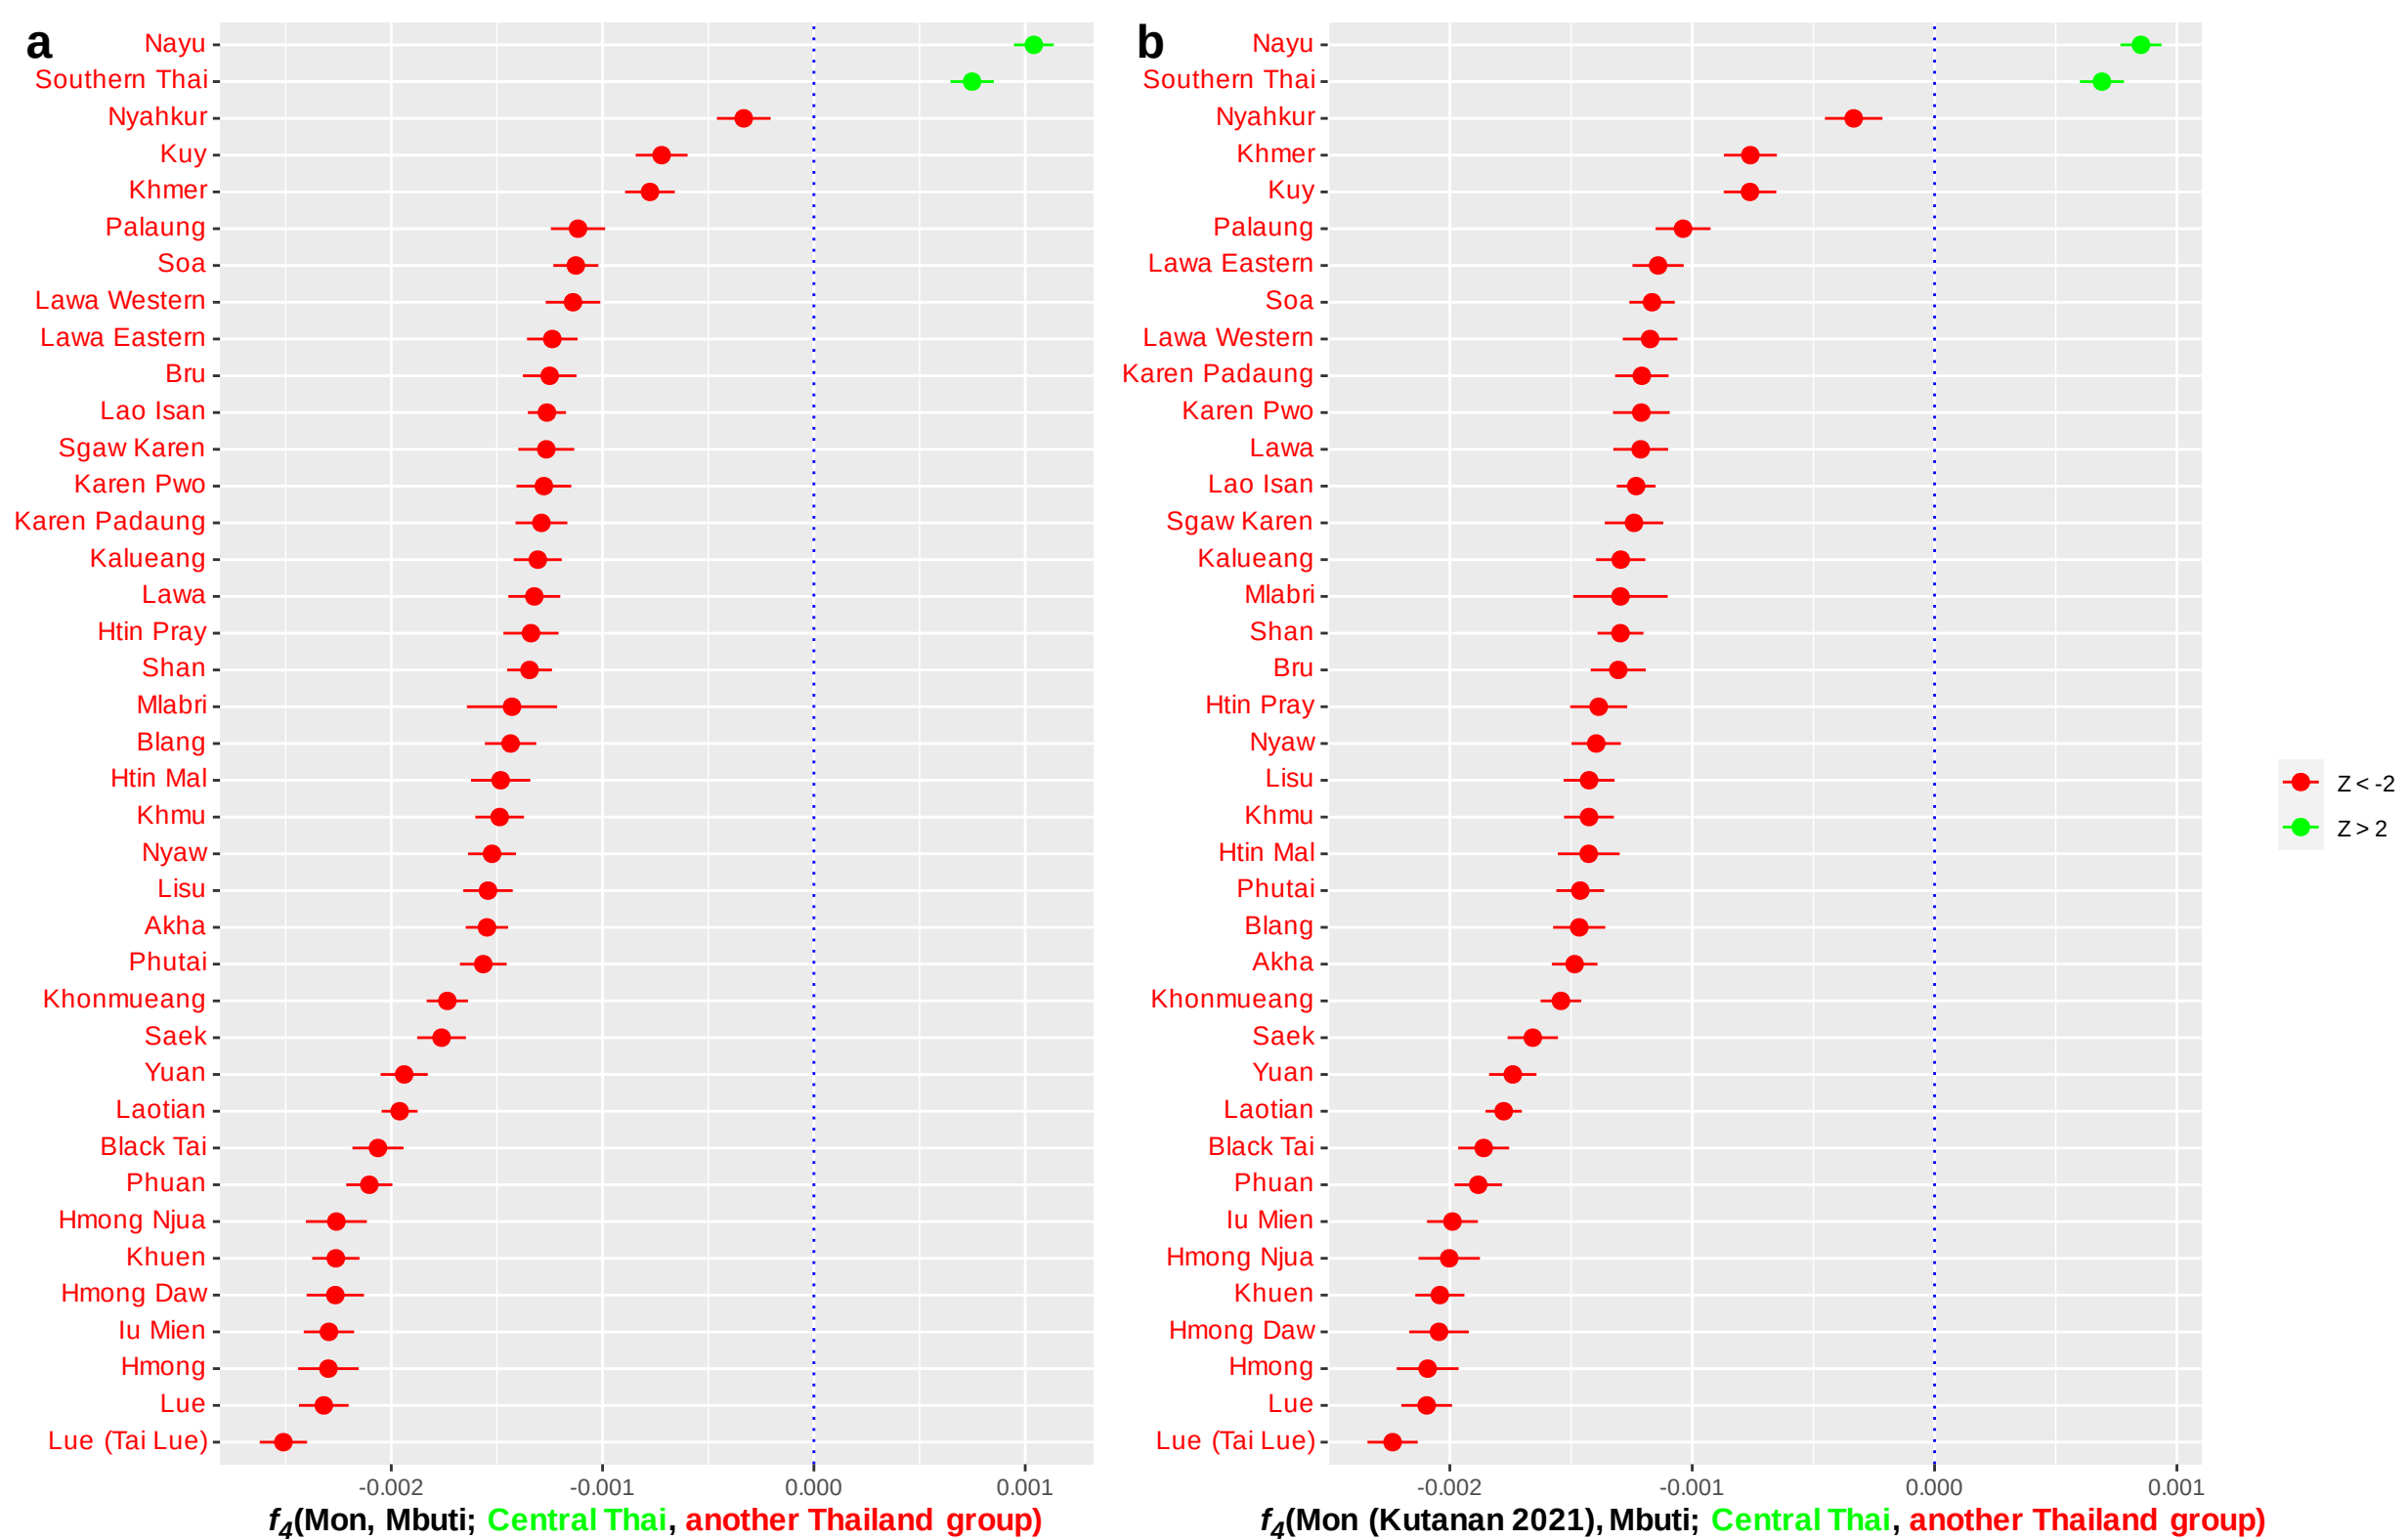

**Suppl. Fig. 4.**  $f_4$ -statistics of the form of  $f_4(\text{Mon, Mbuti; Central Thai, another group from Thailand})$ . Data for Mon in panels a and b are from Changmai et al. (2022)<sup>6</sup> and Kutanan et al. (2021)<sup>5</sup>, respectively.  $f_4$ -statistics with Z-scores >2 are shown in green, and those with Z-scores <-2 are shown in red.
